# Supplementary material for: Centralized softening as a solution to chloride pollution: An empirical analysis based on Minnesota cities
Source: PLoS One. 2021 Feb 5;16(2):e0246688. doi: 10.1371/journal.pone.0246688 (PMC7864447; doi:10.1371/journal.pone.0246688)
Supplement: S1 Data — (XLSX) [file pone.0246688.s001.xlsx]

## Sheet: S1 Data for paper
Cities	Population for 2017	Number of hhlds	Median household income ($s)	Softener capital costs ($s)	Softener OM costs ($s)	Max daily production (gallons)	Current OM Costs-DWPs ($s)	Current Liabilities-DWPs ($s)	Capital Costs-CS-LS ($s)	Future OM Costs-CS-LS ($s)	Capital Costs-CS-RO ($s)	Future OM Costs-CS-RO ($s)	Current OM Costs-WWTPs ($s)	Current Liabilities-WWTPs ($s)	Capital Costs-RO-EC (millions of $s)	Future OM Costs-RO-EC (millions of $s)
Adrian	1213	550	52250	2048	168	111000	175873	0	8000000	283605	1.72869e+06	162060	92750	0	21.84	1.93
Albert Lea	17715	8644	43532	2048	168	4800000	1613321	249187	1.93333e+07	12264000	22449956	7008000	3513347	0	182.84	15.33
Albertville	7415	2519	87974	2048	168	0	366240	10660	8000000	0	1460000	0	761960	305558	28.09	2.45
Alexandria	25308	7221	46009	2048	168	2900000	1926257	302258	1.40556e+07	7409500	1.01412e+07	4234000	5580742	13085519	61.52	5.23
Altura	479	195	63036	2048	168	125000	132780	0	8000000	319375	1762575	182500	94934	0	23.03	2.03
Amboy	513	292	47188	2048	168	69200	128545	0	8000000	176806	1.62751e+06	101032	203651	0	22.39	1.98
Appleton	1341	822	35300	2048	168	453000	320668	50560	8000000	1157415	2.50658e+06	661380	427557	101120	23.75	2.09
Arlington	2160	980	47083	2048	168	1103000	277766	187085	9.06389e+06	2818165	4.98595e+06	1610380	427742	389474	27	2.36
Ashby	438	217	46094	2048	168	120000	88322	73826	8000000	306600	1750472	175200	156787	40550	20.74	1.84
Avon	1551	655	72813	2048	168	322000	225349	328607	8000000	822710	2.23943e+06	470120	593478	208926	23.59	2.08
Barnesville	2592	1094	68313	2048	168	600000	292742	97490	8000000	1533000	3149192	876000	357092	311040	24.58	2.16
Blooming Prairie	1977	838	58194	2048	168	350000	209665	222798	8000000	894250	2307210	511000	547762	33759	27.82	2.43
Blue Earth	3131	1634	45884	2048	168	800000	814495	420794	8.22222e+06	2044000	3940036	1168000	840953	538960	28.53	2.49
Braham	1789	804	44063	2048	168	229000	227211	142246	8000000	585095	2.01432e+06	334340	357037	28460	23.39	2.06
Brewster	472	209	51875	2048	168	50000	152052	0	8000000	127750	1581030	73000	85356	0	21.54	1.91
Caledonia	2753	1344	46066	2048	168	560000	303341	10445	8000000	1430800	2.9798e+06	817600	523594	238352	24.9	2.18
Canton	347	167	36500	2048	168	55000	152099	0	8000000	140525	1593133	80300	128716	23543	20.42	1.81
Dawson	1412	855	43370	2048	168	500000	275884	153959	8000000	1277500	2.71814e+06	730000	367846	307919	24.02	2.11
Detroit Lakes	9217	5108	38197	2048	168	2250000	1198728	272857	1.225e+07	5748750	8.14455e+06	3285000	1625580	233179	37.76	3.25
Dodge Center	2722	1033	52115	2048	168	210000	370831	0	8000000	536550	1968326	306600	398604	0	28.47	2.48
Edgerton	1118	567	50139	2048	168	180000	164409	27723	8000000	459900	1895708	262800	105119	0	20.9	1.85
Ellsworth	463	241	43333	2048	168	0	71212	0	8000000	0	1460000	0	47086	42882	21.03	1.86
Emmons	380	190	48500	2048	168	60000	15416	0	8000000	153300	1605236	87600	23318	16670	20.94	1.86
Fairmont	10129	5362	48973	2048	168	2190000	2958716	1315535	1.20833e+07	5595450	7.9823e+06	3197400	1753358	817936	54.43	4.64
Fosston	1491	806	37917	2048	168	400000	308433	329501	8000000	1022000	2428240	584000	672604	451518	24.22	2.13
Gonvick	281	152	34250	2048	168	60000	55307.6	6320	8000000	153300	1605236	87600	73743.4	12640	20.64	1.83
Goodhue	1177	465	69028	2048	168	200000	97984	79090	8000000	511000	1944120	292000	0	0	20.72	1.84
Grove City	614	245	52917	2048	168	105000	150928	82203	8000000	268275	1714163	153300	61013	4827814	21.83	1.93
Harmony	997	533	49167	2048	168	200000	190798	47719	8000000	511000	1944120	292000	305599	36347	21.56	1.91
Hayfield	1332	634	51150	2048	168	140000	249740	101053	8000000	357700	1798884	204400	332987	202107	25.12	2.2
Hector	1062	574	58594	2048	168	275000	257345	83098	8000000	702625	2125665	401500	212601	73744	25.7	2.25
Holdingford	714	293	50729	2048	168	208600	132794	58251	8000000	532973	1.96494e+06	304556	226360	87347	22.01	1.94
Hutchinson	13898	6505	55705	2048	168	2799000	2310841	1524248	1.3775e+07	7151445	9.79162e+06	4086540	3038581	1503107	68	5.77
Jordan	6242	2326	66194	2048	168	1042000	780873	4596642	8.89445e+06	2662310	4.78809e+06	1521320	865349	826458	31.28	2.72
Kerkhoven	710	366	44167	2048	168	180000	33335	42988	8000000	459900	1895708	262800	56569	0	21.17	1.88
Lafayette	494	249	60000	2048	168	178000	171128	43155	8000000	454790	1.89087e+06	259880	150856	44916	20.69	1.83
Le Center	2481	1083	45313	2048	168	796000	353938	1519060	8.21111e+06	2033780	3.92508e+06	1162160	408599	163935	27.15	2.37
Lester Prairie	1727	740	58108	2048	168	328000	173290	115810	8000000	838040	2.25396e+06	478880	356210	284688	23.07	2.03
Lewiston	1562	640	62716	2048	168	185000	162465	96626	8000000	472675	1907811	270100	583946	233602	22.95	2.02
Litchfield	6603	2953	52857	2048	168	1825000	735121	361927	1.10694e+07	4662875	7.02331e+06	2664500	2552516	1987804	47.34	4.05
Littlefork	609	329	41667	2048	168	90000	144481	25779	8000000	229950	1677854	131400	27553	0	20.58	1.83
Lonsdale	4006	1347	70435	2048	168	1600000	541426	103236	1.04444e+07	4088000	6429092	2336000	626533	489618	25.94	2.27
Luverne	4602	2121	51062	2048	168	1400000	1250826	430760	9.88889e+06	3577000	5877880	2044000	1077125	214626	33.15	2.87
Madelia	2259	1110	43664	2048	168	1514000	606041	3	1.02056e+07	3868270	6.19568e+06	2210440	2036666	281855	31.46	2.73
Madison	1419	935	41893	2048	168	360000	488232	0	8000000	919800	2331416	525600	513855	42317	24.1	2.12
Mayer	2089	627	93182	2048	168	387000	348177	1142989	8000000	988785	2.39677e+06	565020	556905	2550767	23.7	2.09
Maynard	350	212	44688	2048	168	107000	88494	57558	8000000	273385	1.719e+06	156220	61233	1763903	21.2	1.88
Melrose	3630	1556	49505	2048	168	3090000	792867	0	1.45833e+07	7894950	1.08524e+07	4511400	1828202	280443	46.45	3.98
Montevideo	5123	2589	50625	2048	168	1064000	898257	317829	8.95556e+06	2718520	4.86011e+06	1553440	1.19768e+06	635657	46.45	3.98
Montgomery	2952	1282	56953	2048	168	701000	525973	3810012	8000000	1791055	3.55981e+06	1023460	700515	735299	28.43	2.48
Morgan	849	459	49118	2048	168	182000	149971	32038	8000000	465010	1.90055e+06	265720	106026	0	23.03	2.03
Morris	5320	2364	47819	2048	168	800000	450078	28254	8.22222e+06	2044000	3940036	1168000	600103	56508	28.39	2.48
Nerstrand	294	135	67917	2048	168	50000	27243	0	8000000	127750	1581030	73000	130184	902808	20.22	1.8
New Prague	7811	2979	75593	2048	168	2071400	1121960	470036	1.17539e+07	5292427	7.66705e+06	3024244	2517918	1735950	36.07	3.11
New Richland	1190	546	41583	2048	168	176000	176606	150408	8000000	449680	1.88603e+06	256960	361523	127176	25.16	2.21
Norwood Young America	3724	1583	65430	2048	168	725000	535634	553737	8.01389e+06	1852375	3.65394e+06	1058500	548815	252112	27.9	2.43
Olivia	2354	1143	53576	2048	168	750000	548020	153212	8.08333e+06	1916250	3.75065e+06	1095000	668653	277607	28.53	2.49
Otsego	16746	5644	99037	2048	168	3317000	1059863	1050274	1.52139e+07	8474935	1.18096e+07	4842820	1913520	1866875	26.23	2.3
Pelican Rapids	2461	1081	42981	2048	168	846000	389764	153444	8.35e+06	2161530	4109717	1235160	1165880	877552	26.68	2.33
Pipestone	4051	2094	38212	2048	168	800000	583435	3757960	8.22222e+06	2044000	3940036	1168000	777321	1160817	28.09	2.45
Prinsburg	495	221	54375	2048	168	42000	42827	5947	8000000	107310	1.56167e+06	61320	133668	126695	20.33	1.8
Renville	1193	644	55625	2048	168	550000	250750	128341	8000000	1405250	2.93683e+06	803000	494297	298315	27.41	2.39
Rochester	115405	47656	68574	2048	168	30200000	9504280	0	8.9889e+07	77161000	7189327672	44092000	17899653	31725390	231.35	19.36
Rogers	12943	4200	120602	2048	168	4585000	1215281	133845	1.87361e+07	11714675	2.0308e+07	6694100	1010162	0	34.05	2.95
Sacred Heart	508	251	40714	2048	168	70000	151009	11407	8000000	178850	1629442	102200	124806	95633	21.95	1.94
Sauk Centre	4381	1874	48920	2048	168	1034000	633240	153533	8.87222e+06	2641870	4.7617e+06	1509640	979893	443316	27.72	2.42
Sherburn	1095	548	49655	2048	168	229000	155184	55194.7	8000000	585095	2.01432e+06	334340	206911	110389	22.79	2.01
Staples	2954	1444	38438	2048	168	541000	512774	156829	8000000	1382255	2.89794e+06	789860	516436	25000	25.87	2.27
Thief River Falls	8813	4265	43946	2048	168	1750000	1702712	836561	1.08611e+07	4471250	6.82705e+06	2555000	818236	79679	46.36	3.97
Trimont	708	349	50395	2048	168	102000	159252	0	8000000	260610	1.7069e+06	148920	239218	97805	21.49	1.9
Truman	1059	514	43542	2048	168	223000	273279	12865	8000000	569765	1.99979e+06	325580	295879	23774	26.76	2.34
Virginia	8484	4868	36327	2048	168	3000000	1610266	523769	1.43333e+07	7665000	10506200	4380000	1770864	945388	57.98	4.94
Wabasso	663	312	48125	2048	168	152000	191066	82925	8000000	388360	1.82793e+06	221920	95476	23901	20.84	1.85
Waldorf	226	113	36042	2048	168	52000	50400.4	0	8000000	132860	1.58587e+06	75920	67200.6	0	20.7	1.84
Waseca	8958	3813	46083	2048	168	3423000	1010857	115437	1.55083e+07	8745765	1.23024e+07	4997580	2092109	681521	50.88	4.35
Watertown	4389	1796	63688	2048	168	456000	457891	174656	8000000	1165080	2.52026e+06	665760	584301	103917	31.04	2.7
Waterville	1868	1029	49667	2048	168	256000	326806	282105	8000000	654080	2.07967e+06	373760	259546	312158	23.39	2.06
Welcome	654	337	47604	2048	168	140000	84500	0	8000000	357700	1798884	204400	152603	42797	22.15	1.96
West Concord	774	339	53352	2048	168	100000	96791	64501	8000000	255500	1702060	146000	263587	150897	24.04	2.11
Willmar	19616	7980	46740	2048	168	5900000	1545280	0	2.23889e+07	15074500	3.77608e+07	8614000	4537433	4901009	86.35	7.3
Windom	4425	2260	36642	2048	168	1535000	936412	298365	1.02639e+07	3921925	6.25312e+06	2241100	1240536	351102	36.07	3.11
Winnebago	1351	734	45156	2048	168	279000	293181	124550	8000000	712845	2.13535e+06	407340	503517	241672	34.92	3.02
Winthrop	1361	635	51667	2048	168	926000	334704	24315	8.57222e+06	2365930	4.39497e+06	1351960	149772	88661	22.93	2.02
Worthington	13164	4783	49016	2048	168	3860000	2566357	243745	1.67222e+07	9862300	1.46993e+07	5635600	1714566	0	55.32	4.72
